# Supplementary material for: Population and allelic variation of A-to-I RNA editing in human transcriptomes
Source: PubMed Central journal article supplement (PMC5532815; doi:10.1186/s13059-017-1270-7), 2017-07-28
Supplement: 13059_2017_1270_MOESM3_ESM.pdf [file 13059_2017_1270_MOESM3_ESM.pdf]

**Additional file 3: Figure S1.** Representative Sanger sequencing chromatograms of the genomic DNAs of four RNA editing sites to confirm absence of unannotated A/G SNPs. The RNA editing site is at the center, highlighted in blue.

NDE1

chr16:15795035

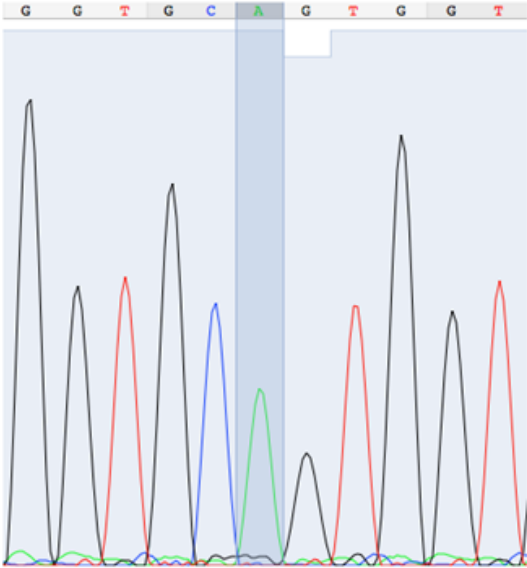

ATM

chr11:108237832

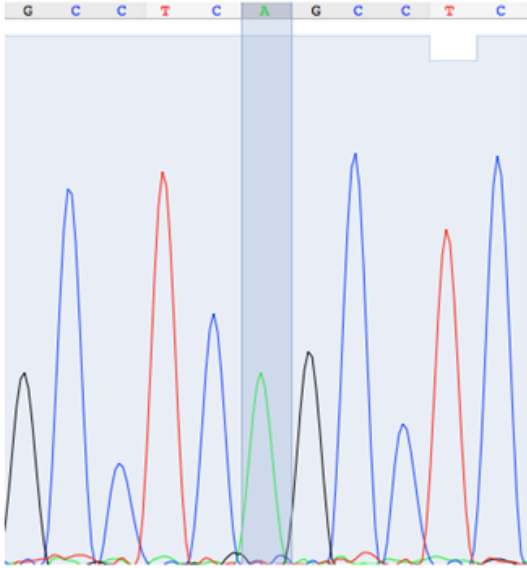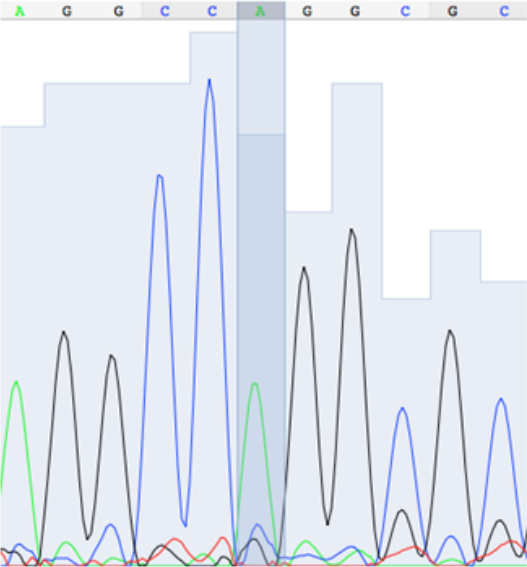

MDM4

chr1:204525548

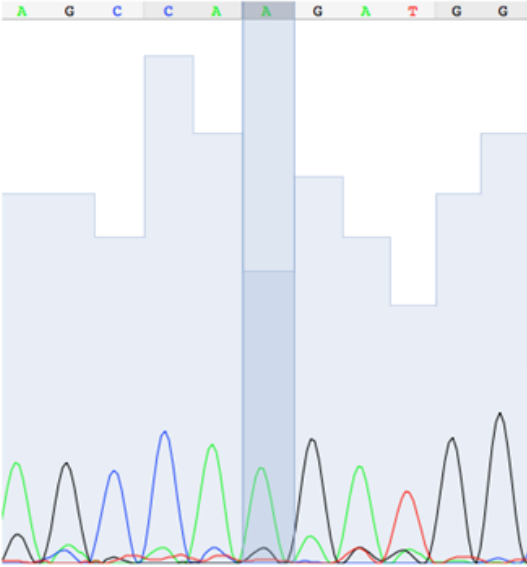

H2AFV

chr7:44872899
