# Supplementary material for: Population and allelic variation of A-to-I RNA editing in human transcriptomes
Source: PubMed Central journal article supplement (PMC5532815; doi:10.1186/s13059-017-1270-7), 2017-07-28

**Additional file 7: Figure S3.** Histograms of RNA editing levels for heterozygous sites determined from the ASED analysis. Significant RNA editing sites were obtained from the ASED analysis and the average RNA editing level ( $\Phi$ ) of each allele for all heterozygous individuals was calculated. This was done for each population separately and the distribution of  $\Phi$  values is plotted with respect to each allele. The allele with lower RNA editing is labeled as Allele 1 and the allele with higher RNA editing is labeled as Allele 2.

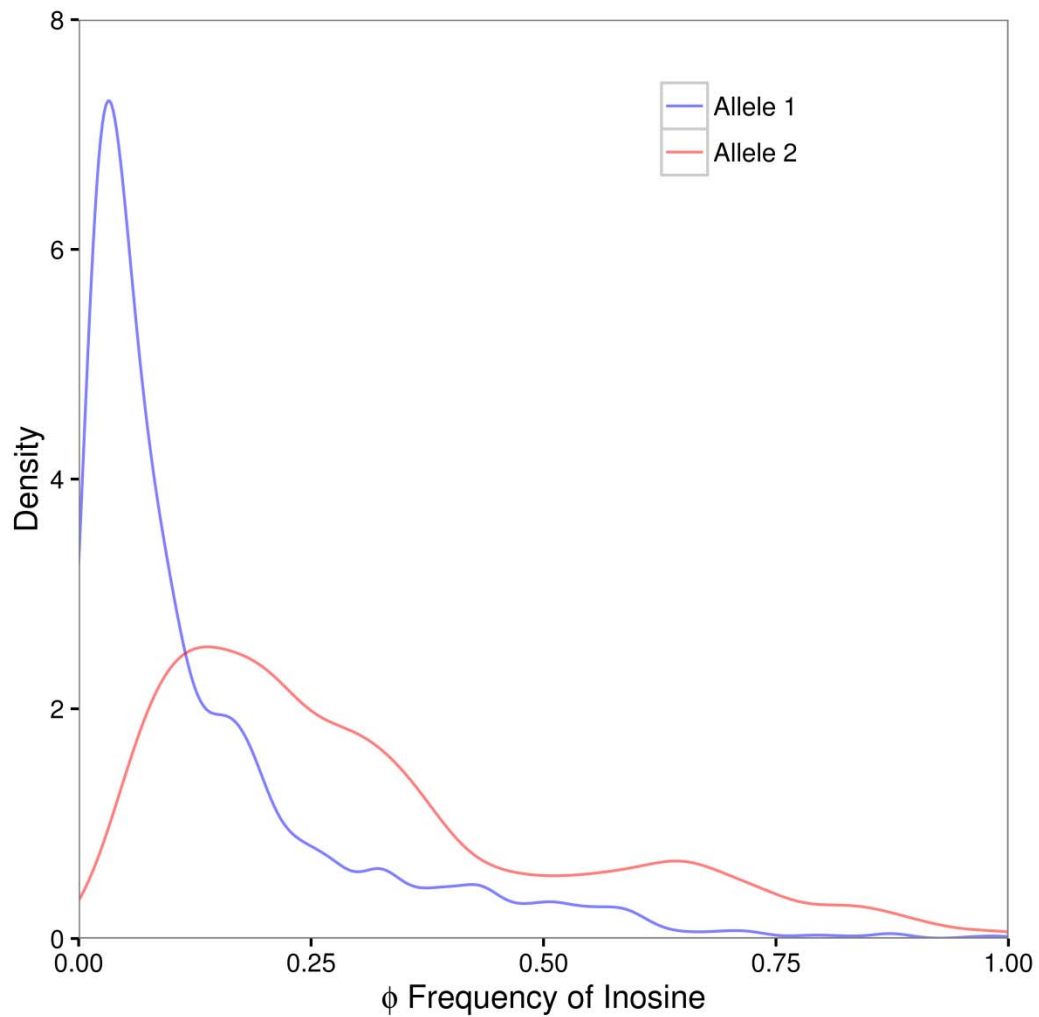

Supplement: 13059_2017_1270_MOESM7_ESM.pdf [file 13059_2017_1270_MOESM7_ESM.pdf]
